# Supplementary material
Source: PubMed Central journal article supplement (PMC8866164)
Supplement: mmc1.pdf [file mmc1.pdf]

**Supplementary Figure 1.** Changes according to four groups of chronicity of psychiatric disorders, relative to the first Covid assessment. Marginal mean levels are adjusted for age, gender and level of education. Error bars represent standard errors. Asterisks indicate that the change in outcome at the particular measurement wave relative to the first Covid measurement differed significantly between subgroups ( $p < 0.01$ ), which were significant for only 2 of 88 (2.3%) tests, indicating that patterns of changes over time were relatively similar in all chronicity groups.

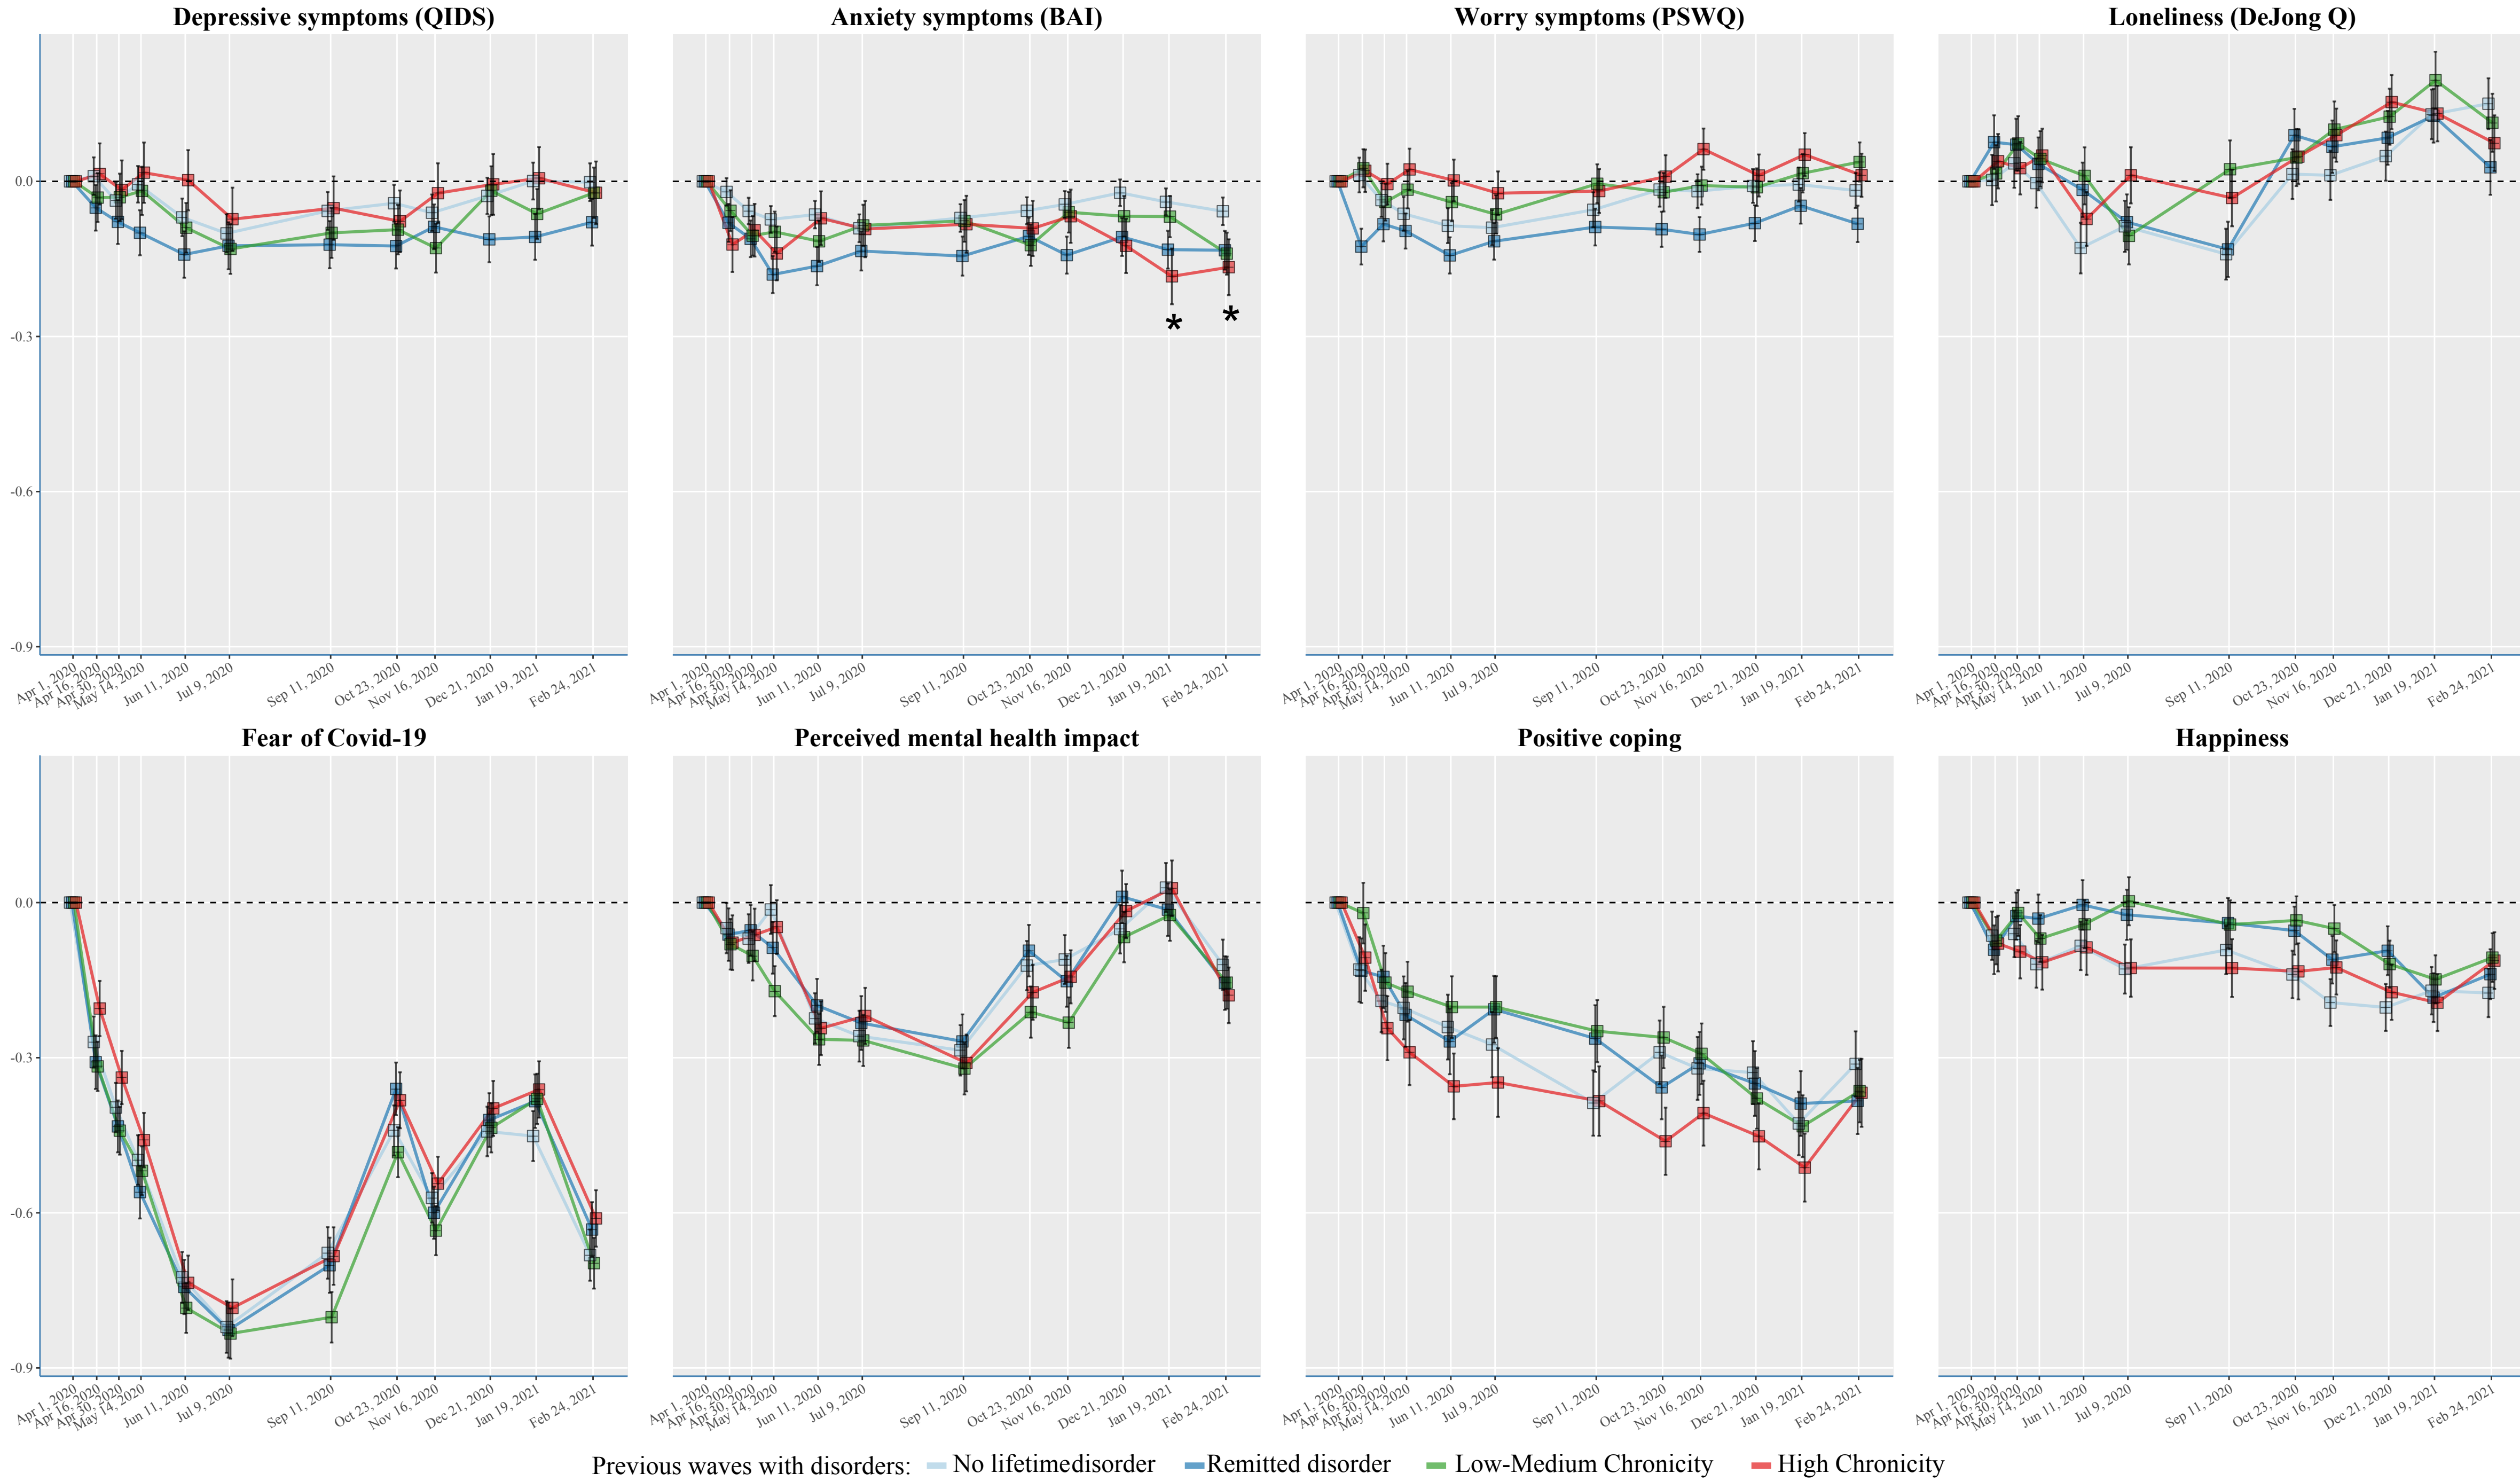

**Supplementary Figure 2.** Sensitivity analysis of changes in eight mental health outcomes during the up to 12 measurements during the Covid-pandemic in n=925 of 1,714 participants, who participated in at least 5 out of 12 measurements.

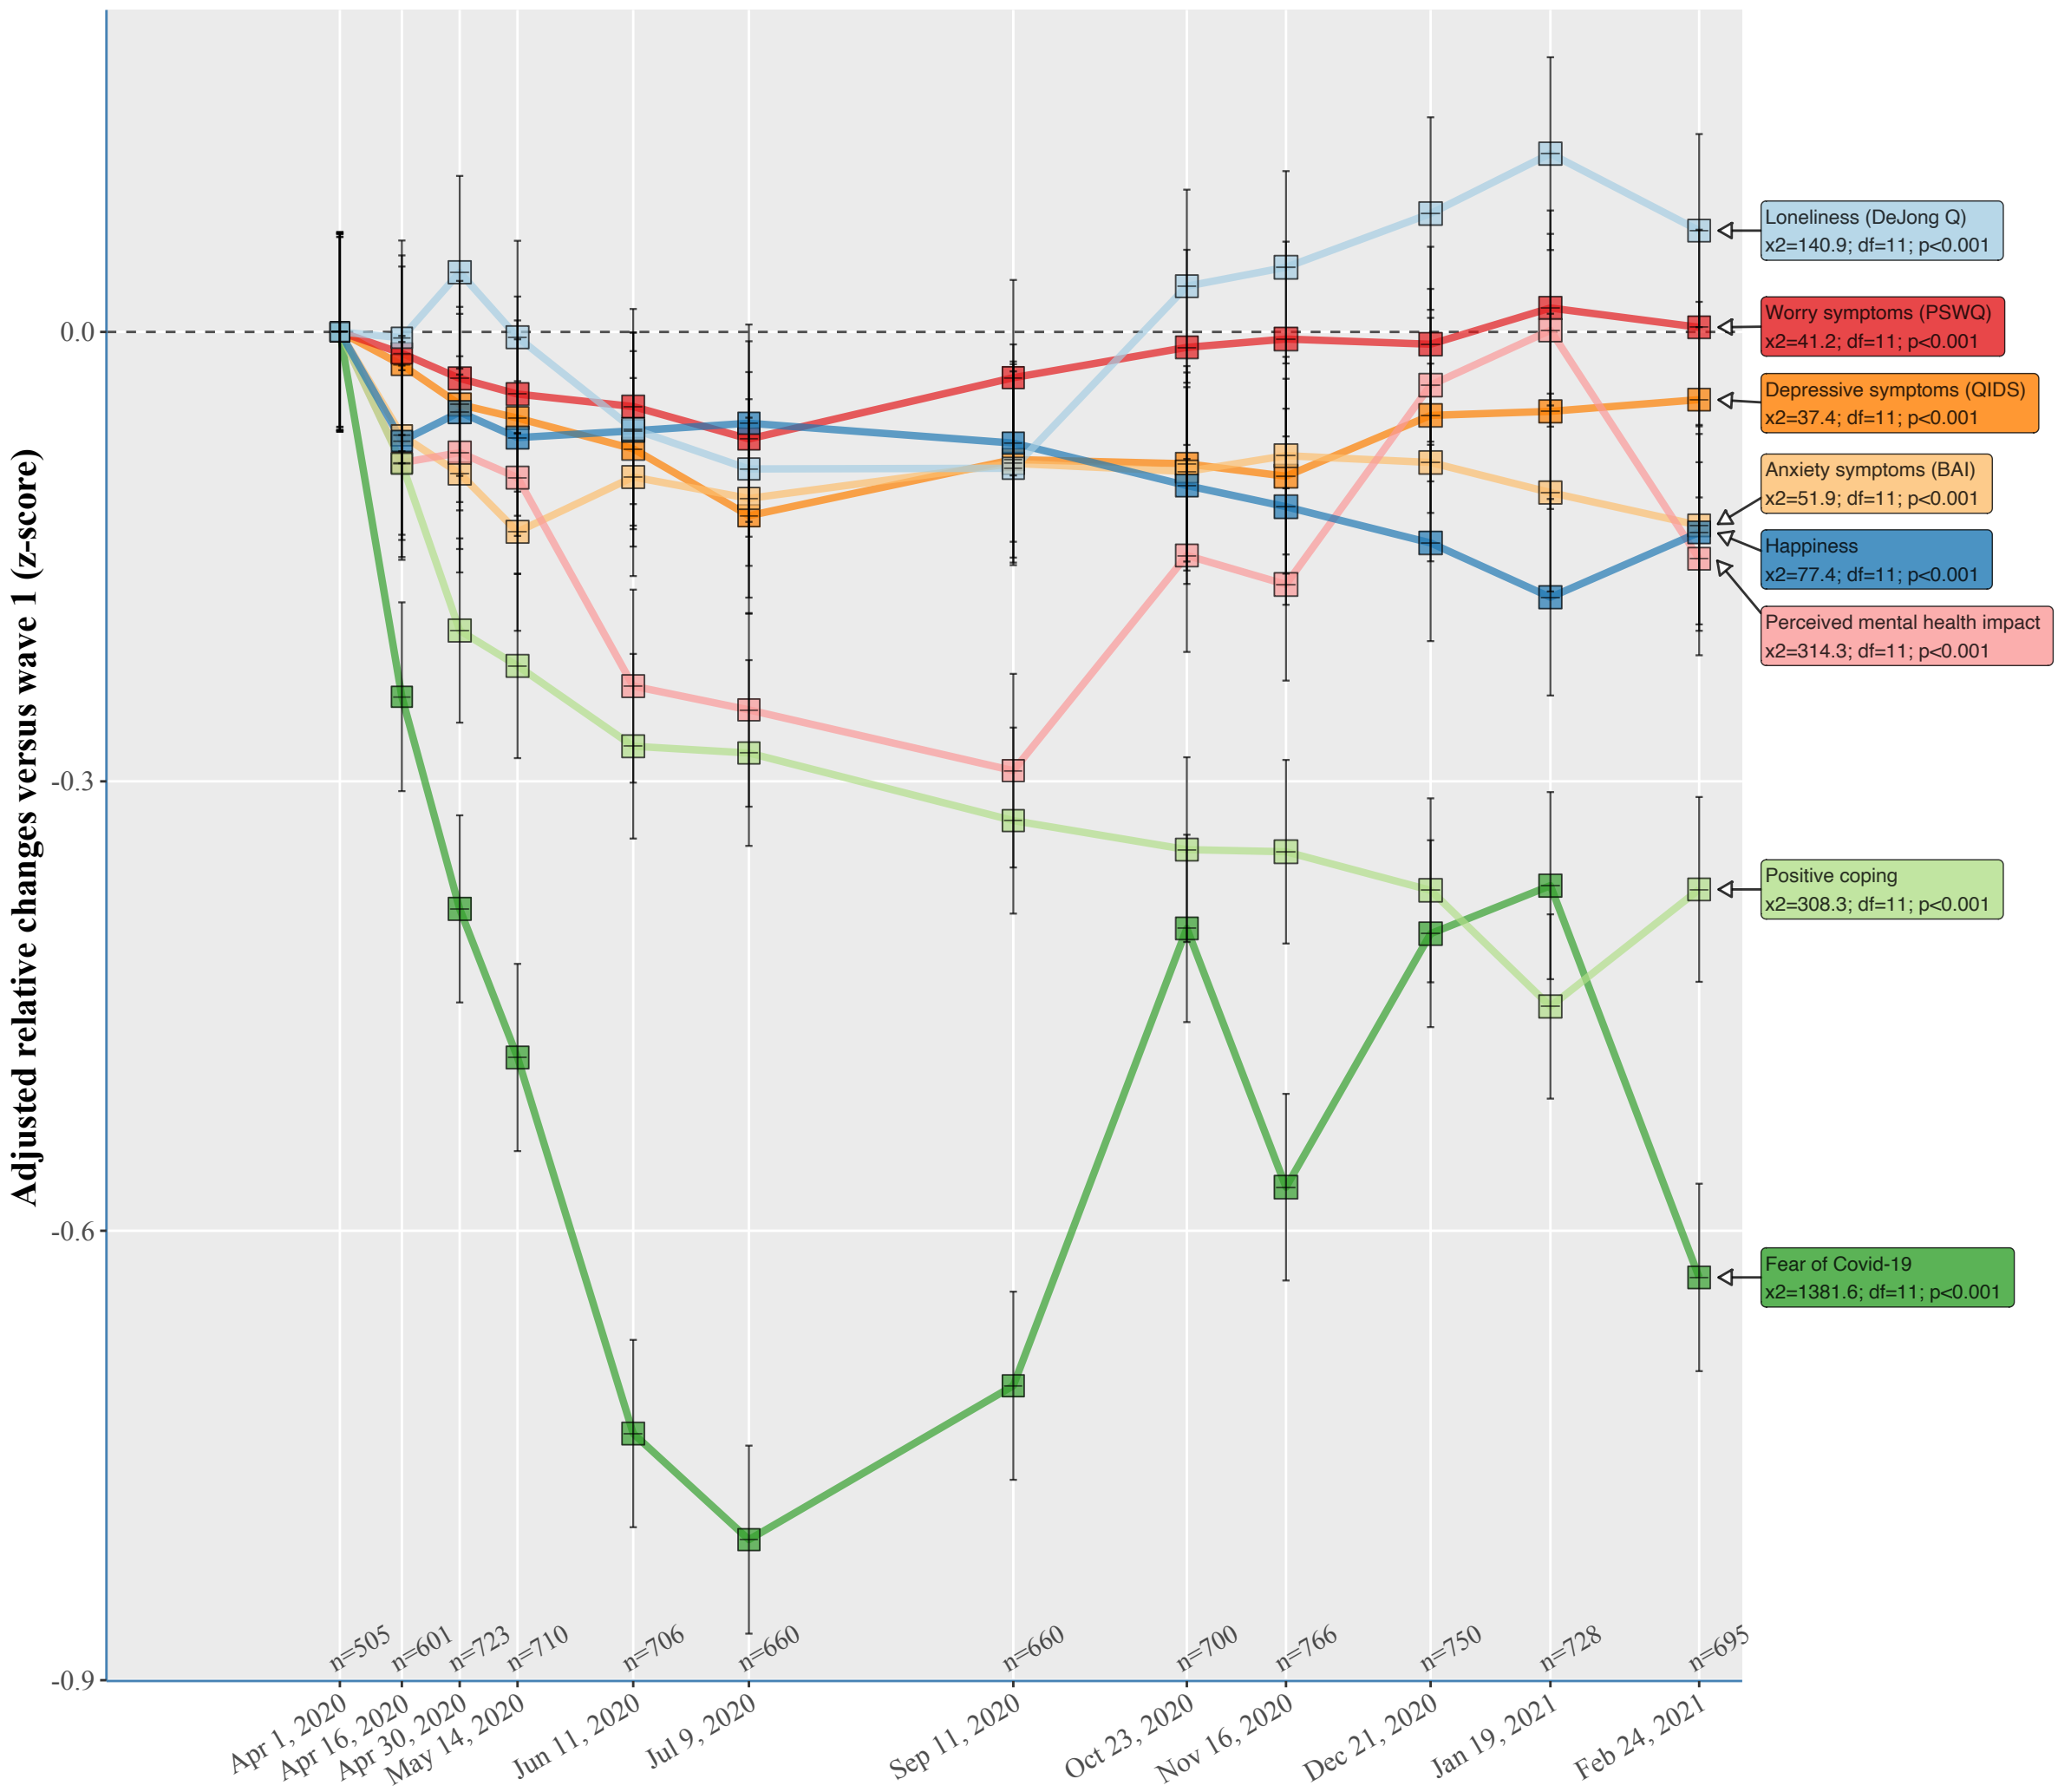

**Supplementary Figure 3.** Sensitivity analysis of changes in eight mental health outcomes during the up to 12 measurements during the Covid-pandemic in n=1,030 of 1,714 participants, who had no Covid-19 infection and no household member infected.

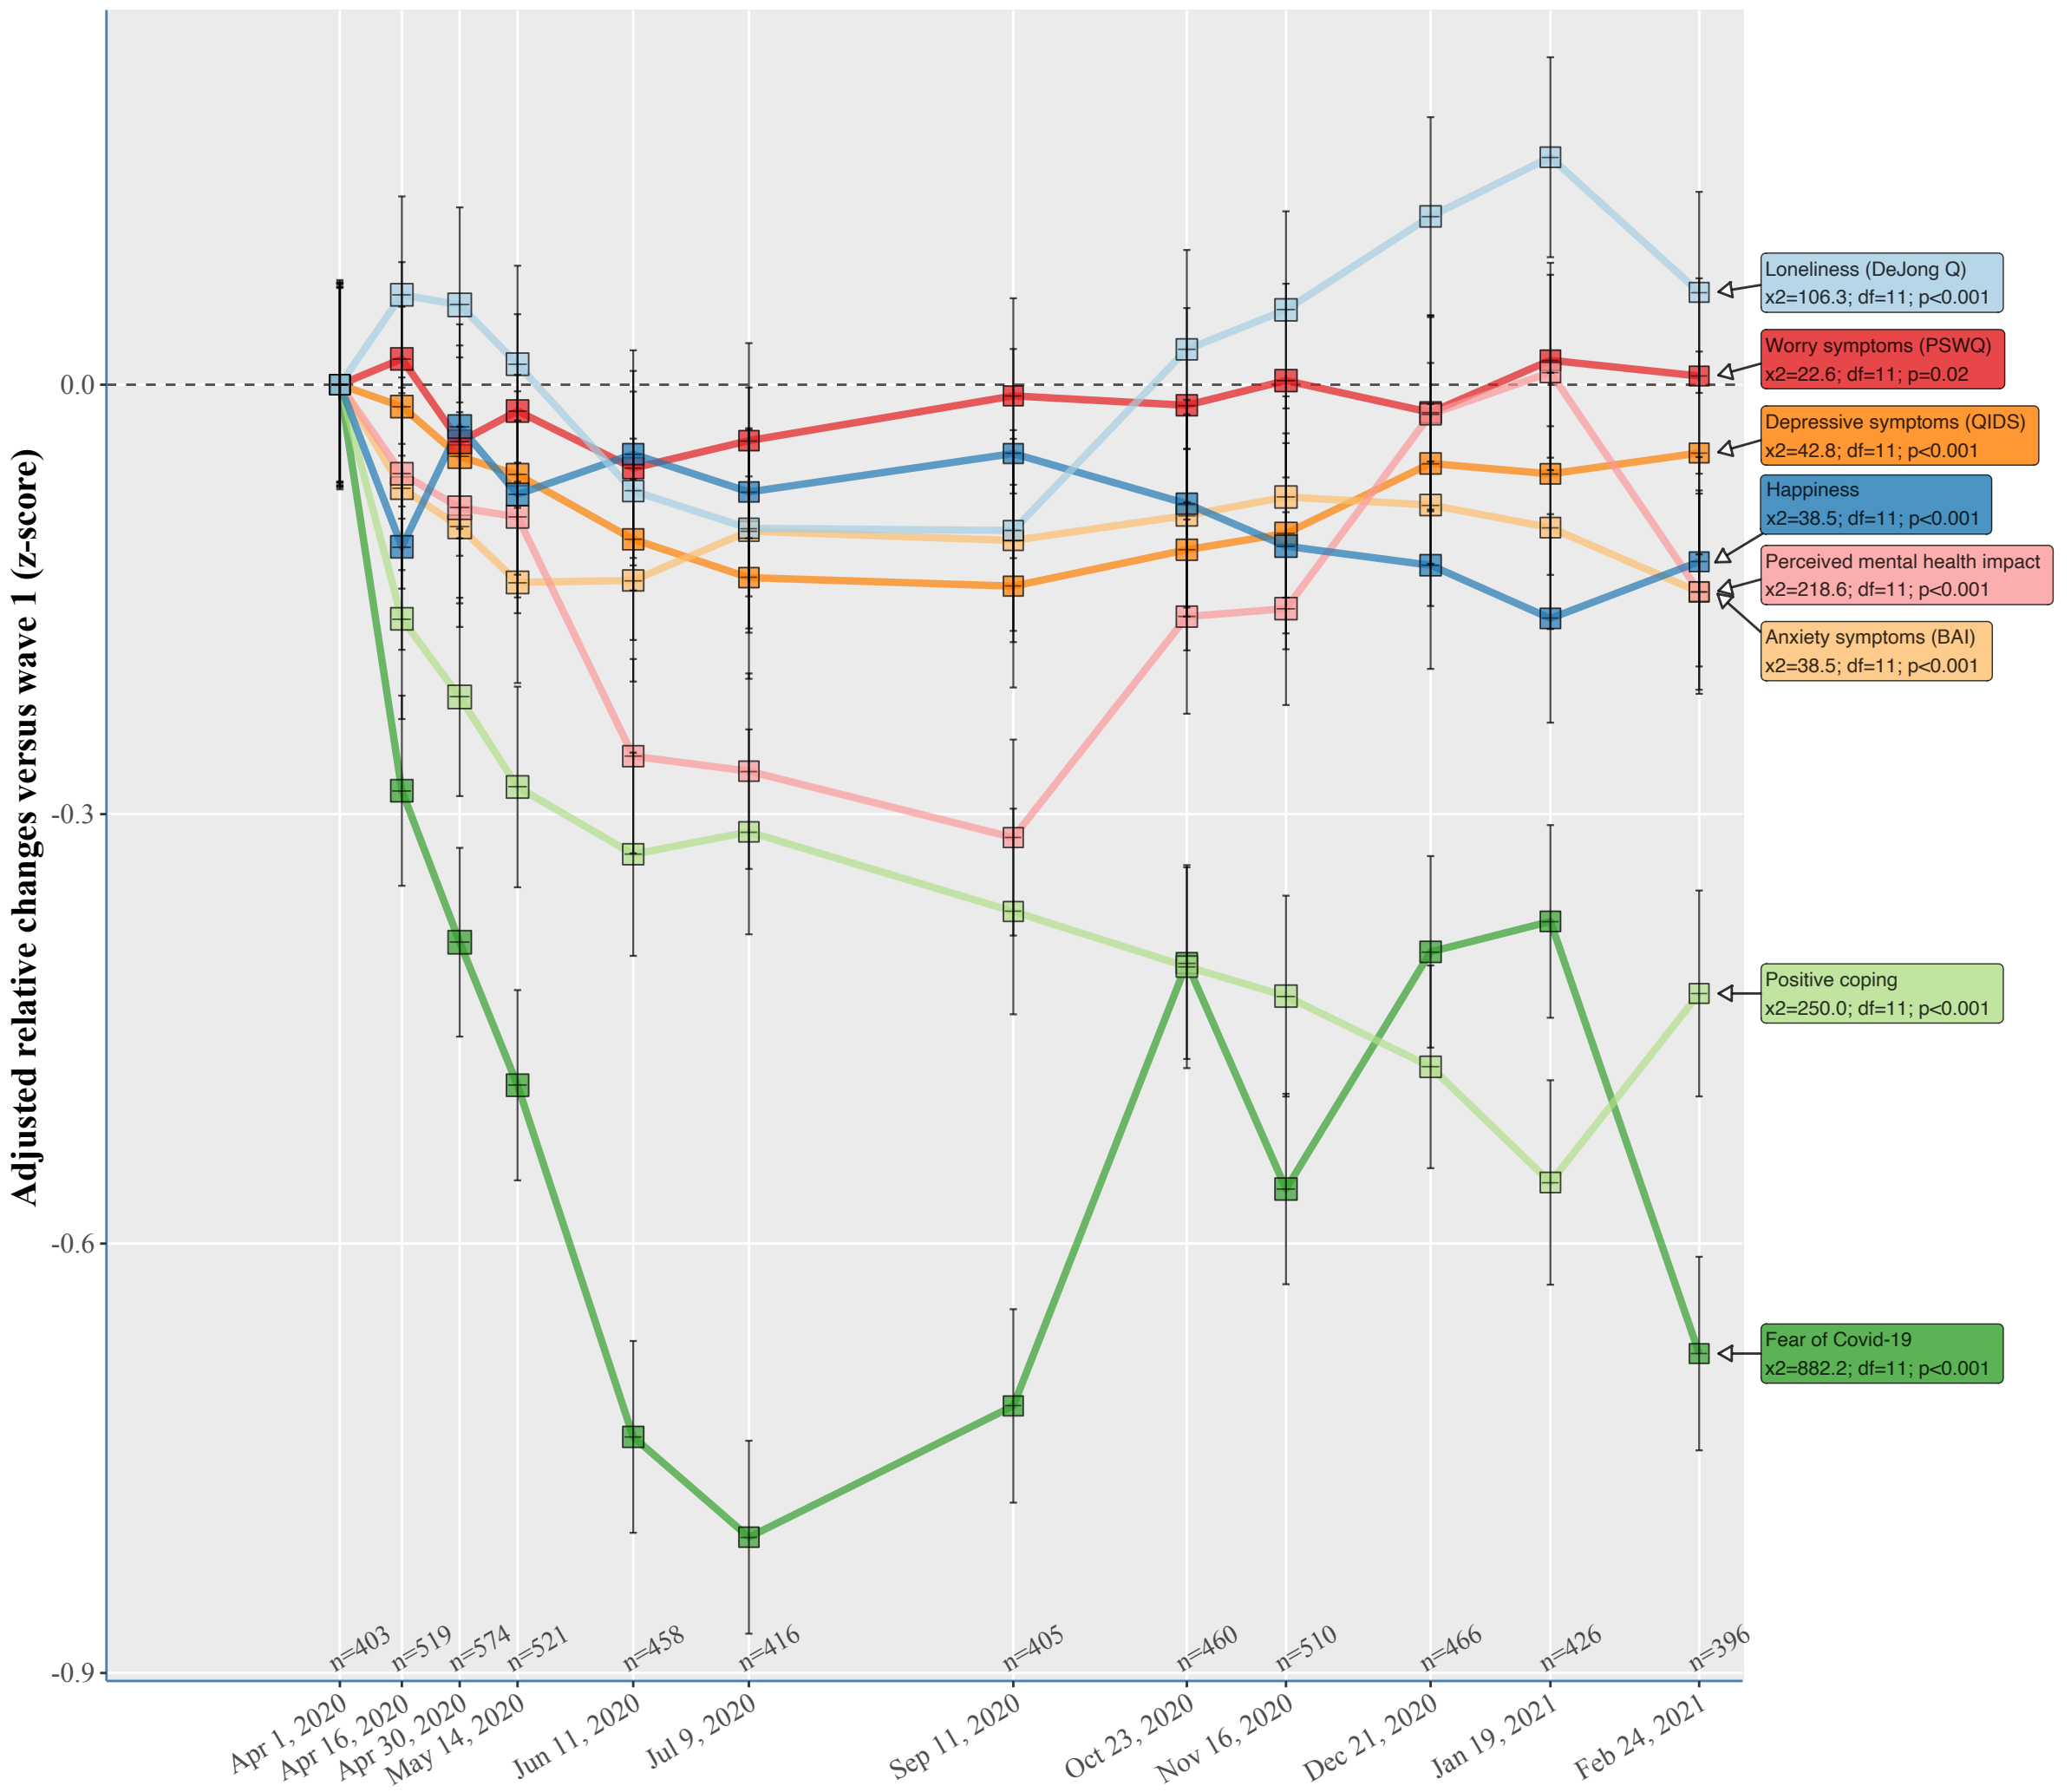

### Depressive symptoms (QIDS)

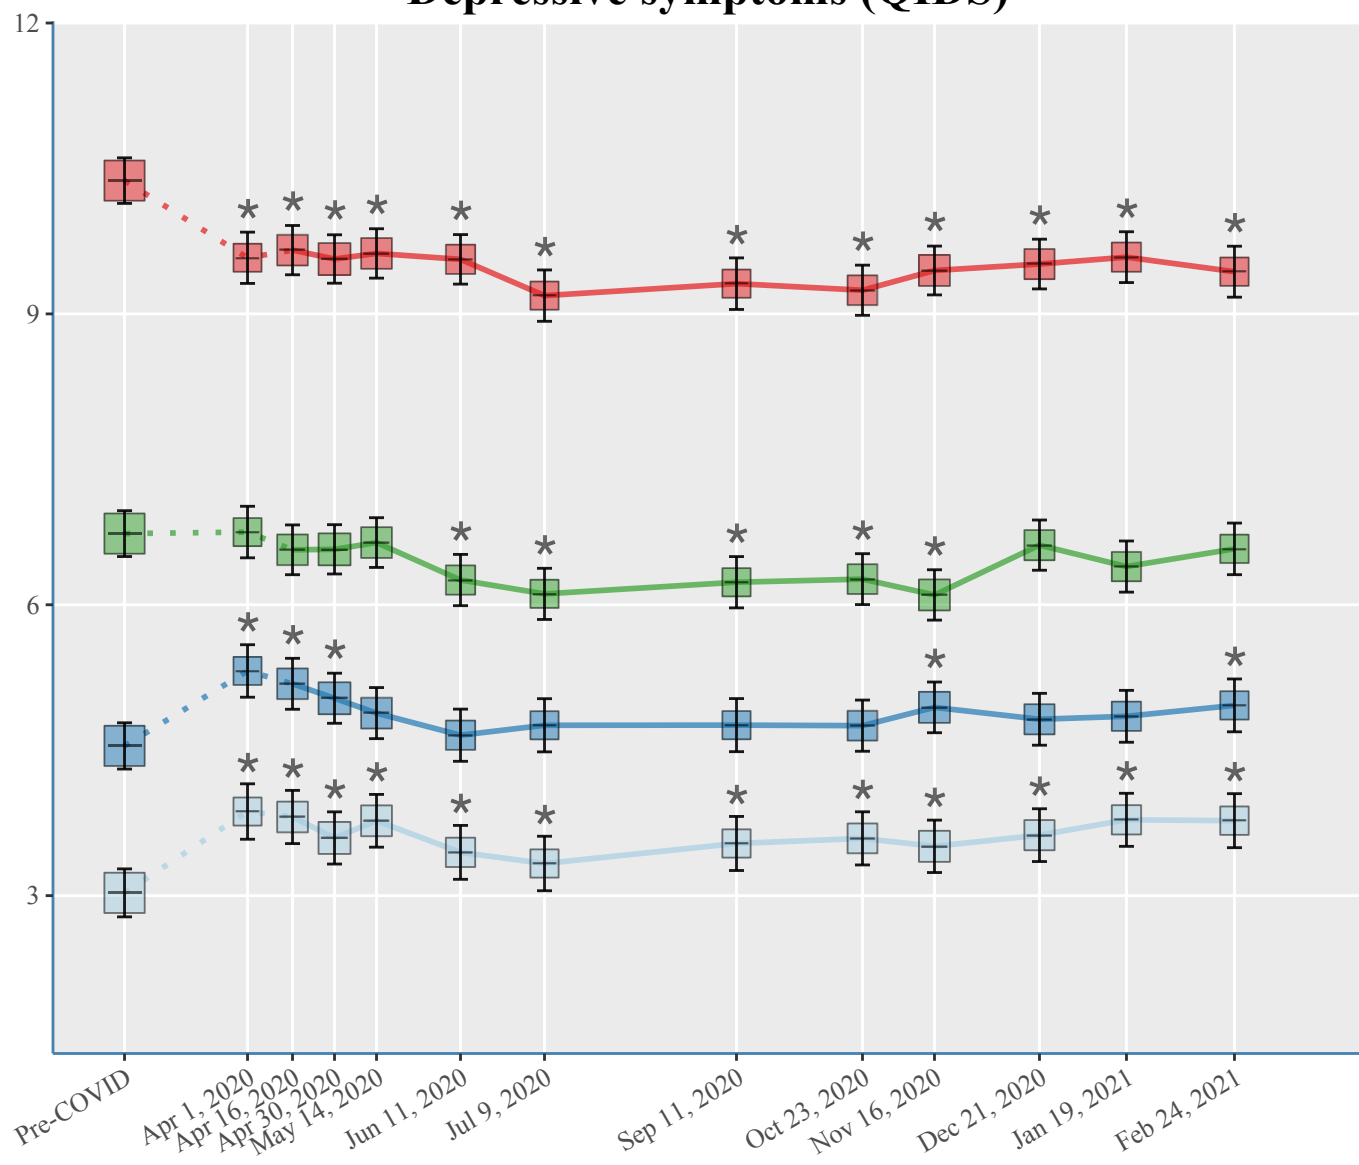

### Anxiety symptoms (BAI)

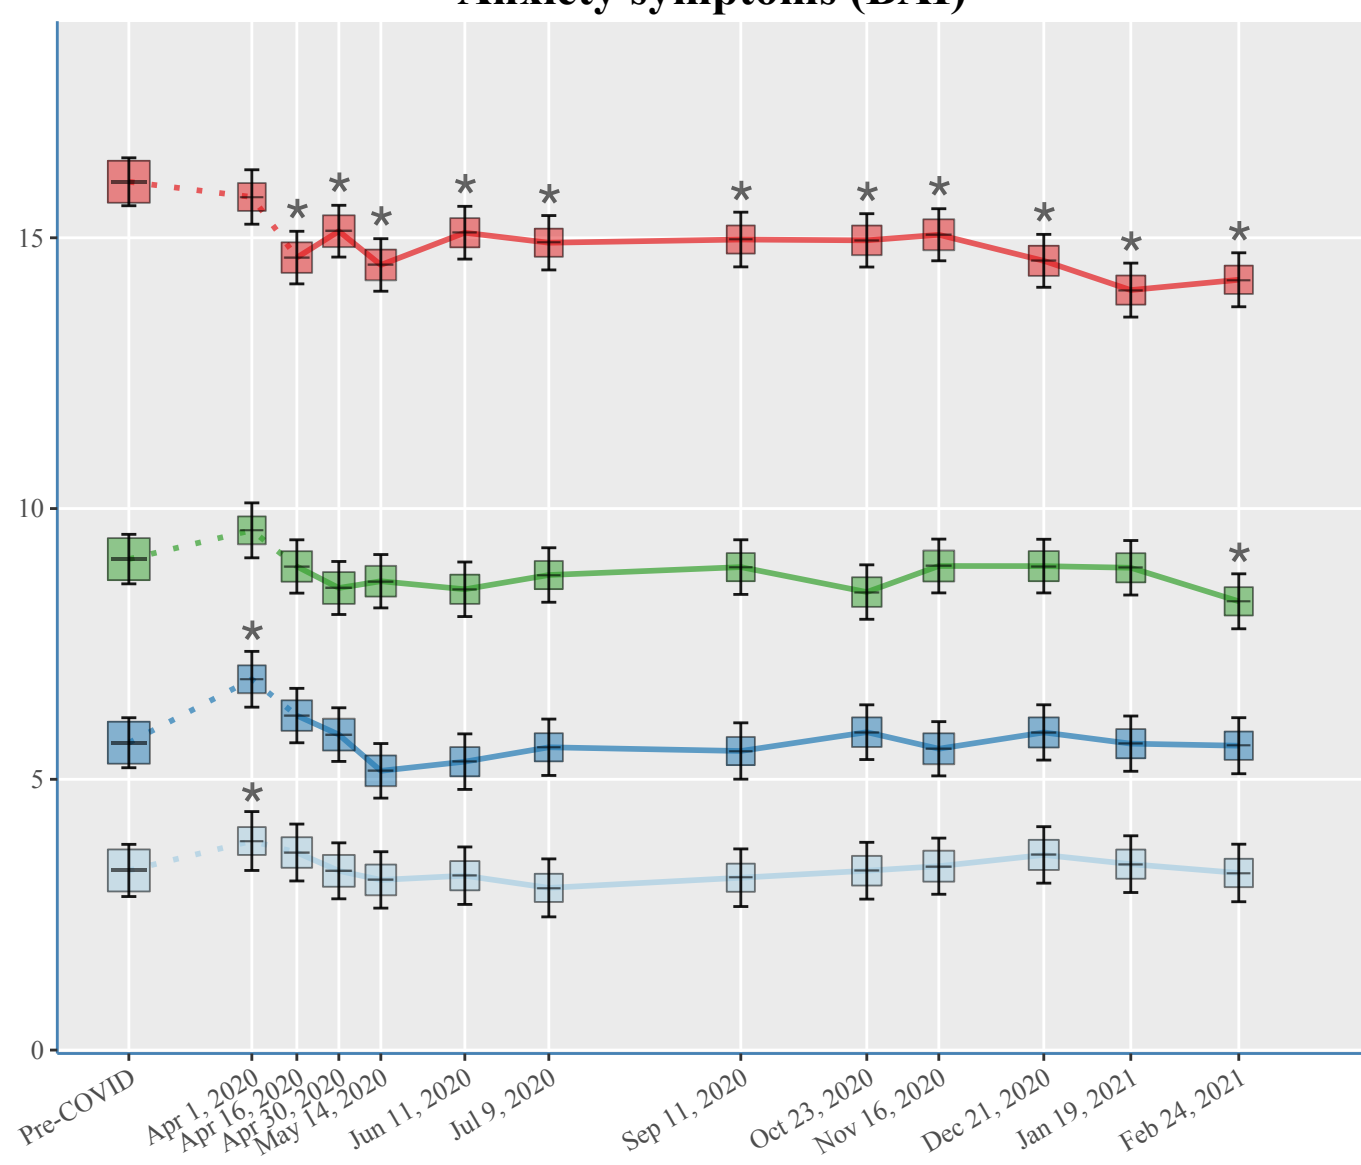

### Worry symptoms (PSWQ)

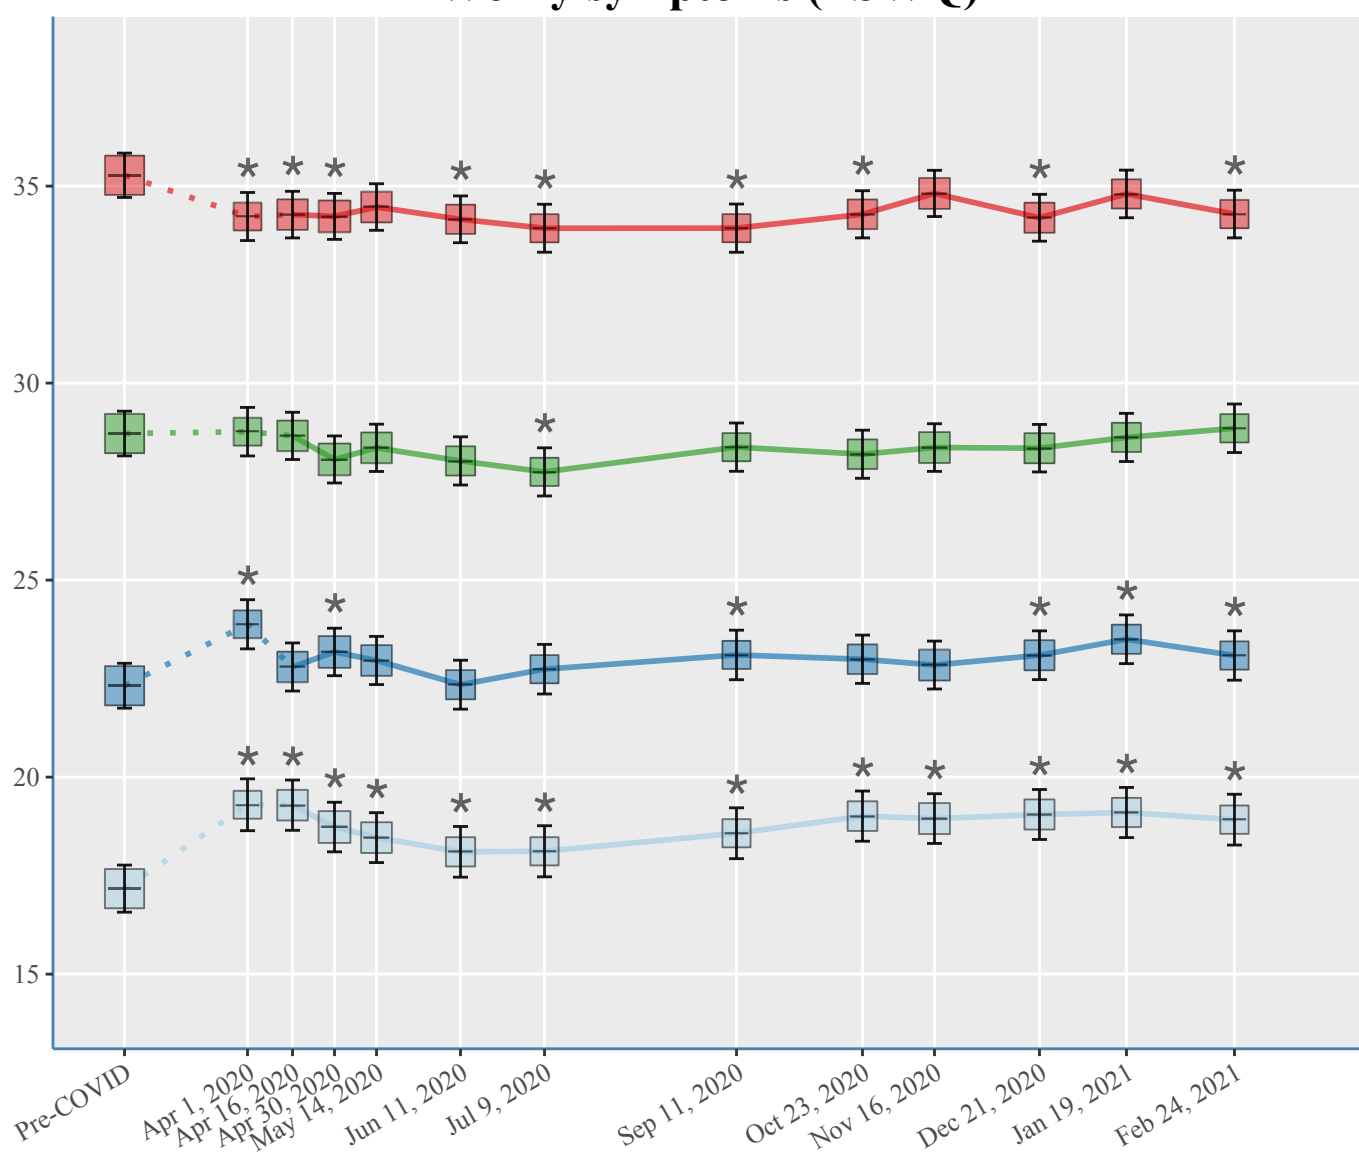

### Loneliness (DeJong Q)

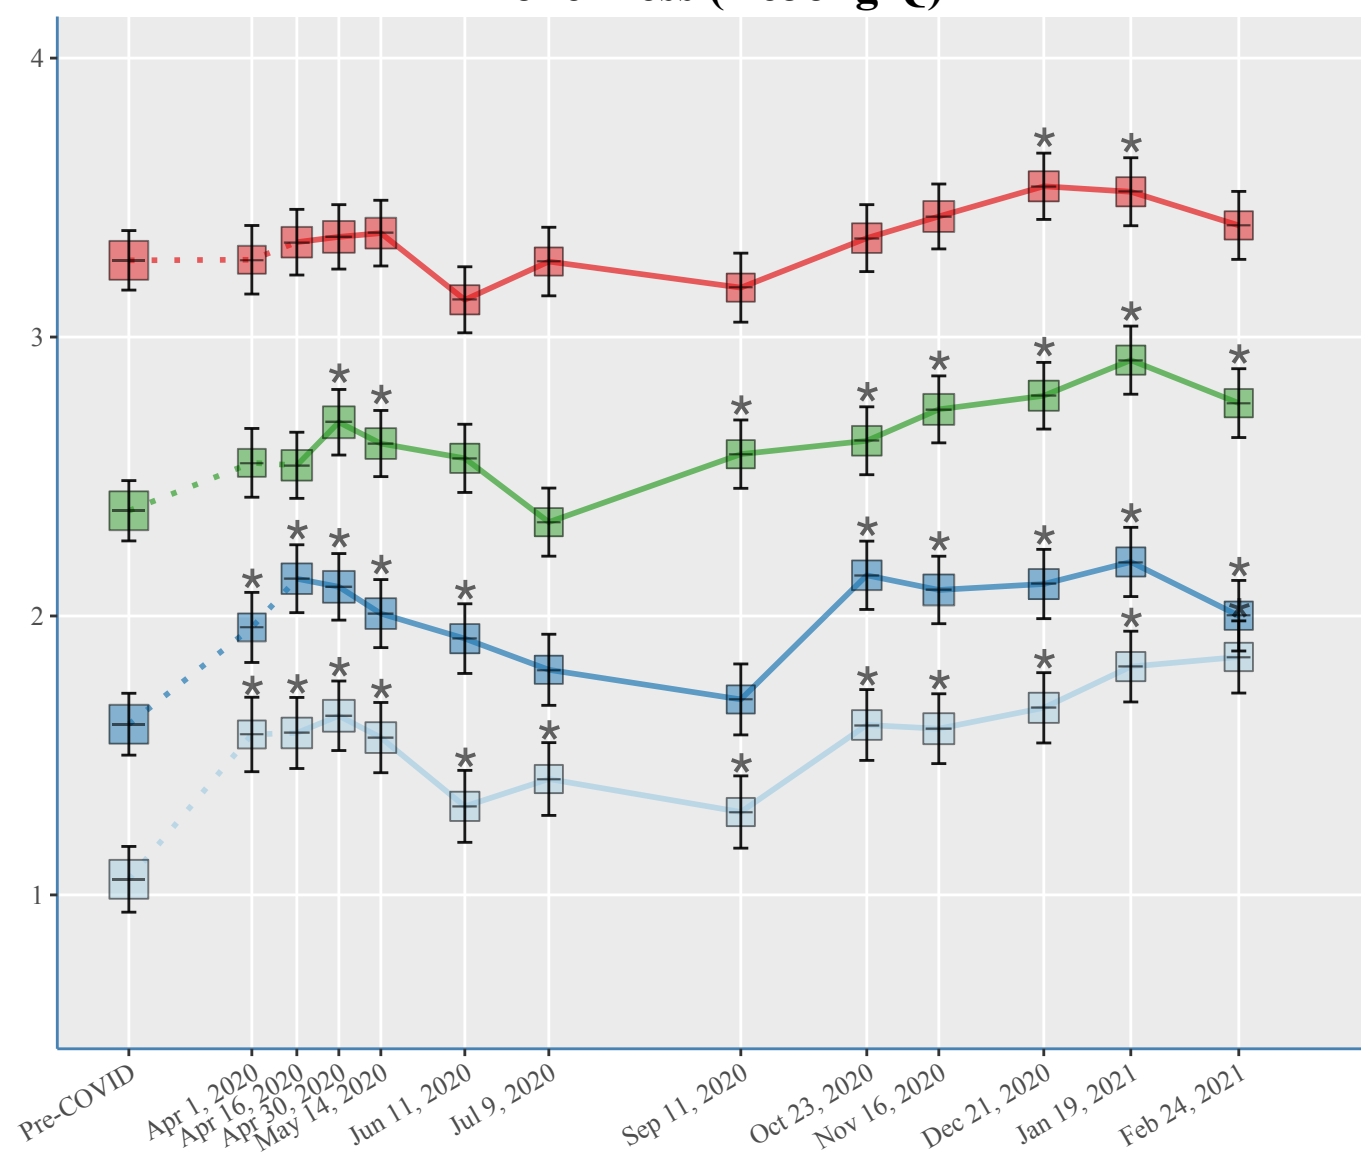

### Happiness

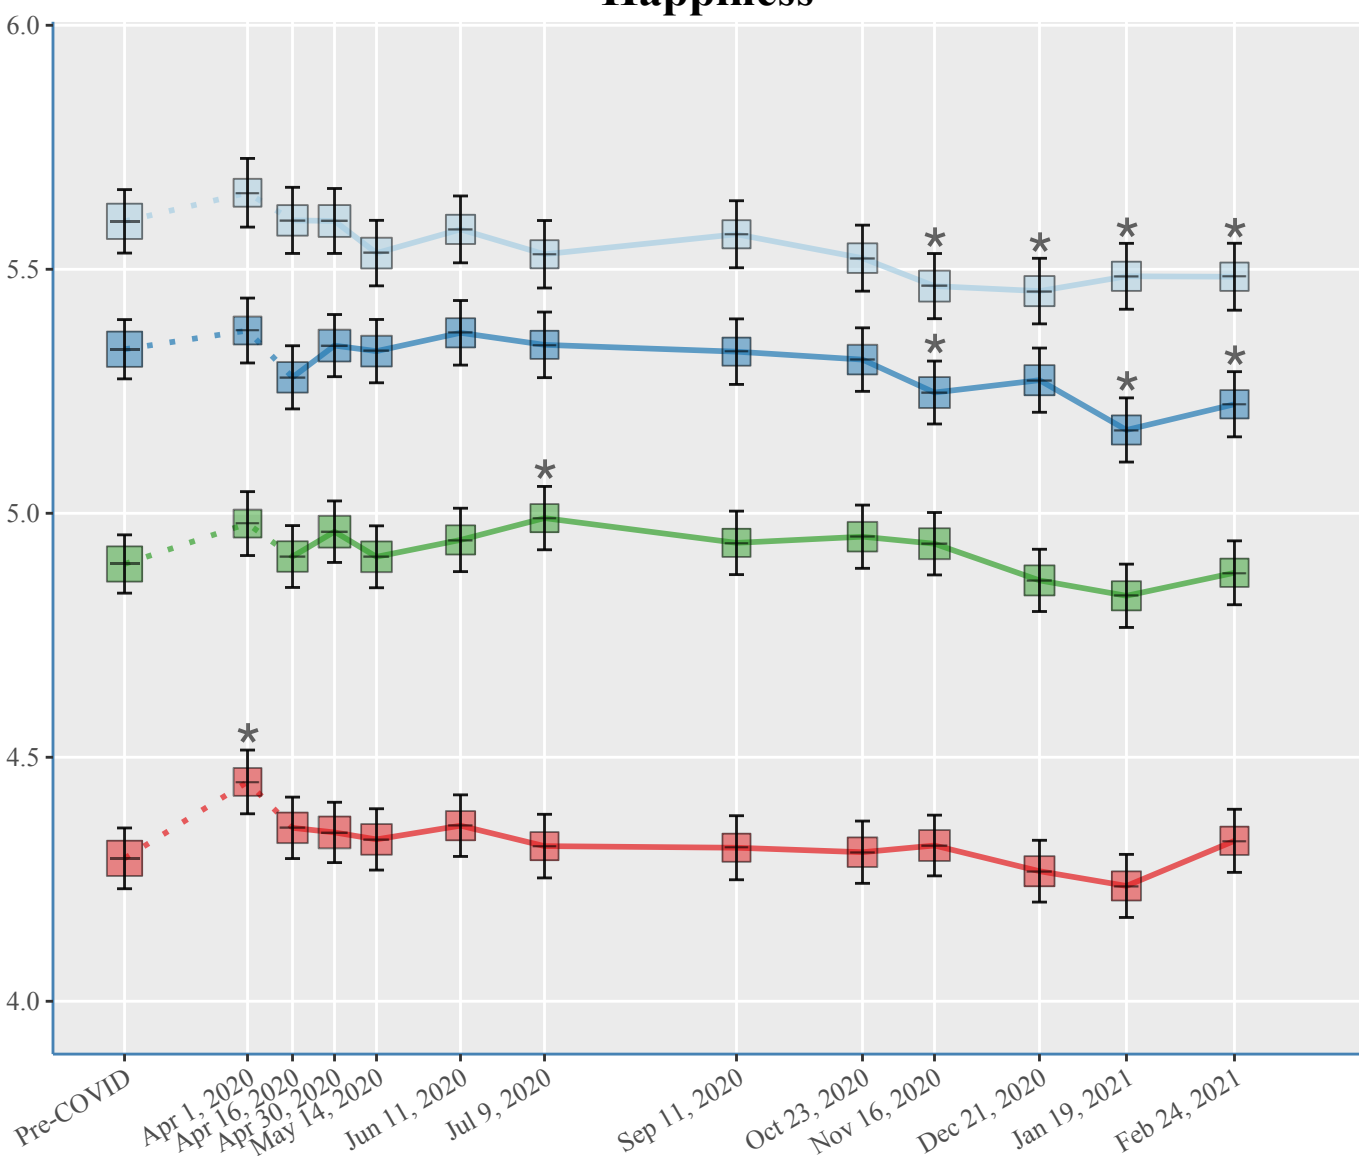

Supplementary Figure 4. Statistical tests of differences in mental health outcomes at each COVID wave compared to pre-pandemic levels. \* $p < .05$ , stratified by pre-pandemic chronicity of mental disorders.

Previous waves with disorders: — No lifetime disorder — Remitted disorder — 1-50% — 51-100%

**Supplementary Table 1.** Crude (unadjusted) mean levels (with standard errors; SE) for each of the eight mental health outcomes for the 12 Covid measurements.

|                                | Date           | Apr 1, 2020         | Apr 16, 2020        | Apr 30, 2020        | May 14, 2020        | Jun 11, 2020        | Jul 9, 2020         | Sep 11, 2020        | Oct 23, 2020        | Nov 16, 2020        | Dec 21, 2020        | Jan 19, 2021        | Feb 24, 2021        |
|--------------------------------|----------------|---------------------|---------------------|---------------------|---------------------|---------------------|---------------------|---------------------|---------------------|---------------------|---------------------|---------------------|---------------------|
|                                | Covid wave no. | 1                   | 2                   | 3                   | 4                   | 5                   | 6                   | 7                   | 8                   | 9                   | 10                  | 11                  | 12                  |
| Depressive symptoms (QIDS)     |                | 6.02<br>(SE: 0.16)  | 6.01<br>(SE: 0.16)  | 5.79<br>(SE: 0.15)  | 5.91<br>(SE: 0.15)  | 5.67<br>(SE: 0.16)  | 5.42<br>(SE: 0.17)  | 5.48<br>(SE: 0.17)  | 5.47<br>(SE: 0.16)  | 5.61<br>(SE: 0.16)  | 5.65<br>(SE: 0.16)  | 5.59<br>(SE: 0.16)  | 5.74<br>(SE: 0.17)  |
| Anxiety symptoms (BAI)         |                | 8.57<br>(SE: 0.34)  | 8.16<br>(SE: 0.31)  | 7.80<br>(SE: 0.30)  | 7.55<br>(SE: 0.31)  | 7.85<br>(SE: 0.32)  | 7.53<br>(SE: 0.33)  | 7.36<br>(SE: 0.32)  | 7.54<br>(SE: 0.32)  | 7.79<br>(SE: 0.31)  | 7.73<br>(SE: 0.31)  | 7.21<br>(SE: 0.31)  | 7.33<br>(SE: 0.34)  |
| Worry symptoms (PSWQ)          |                | 27.54<br>(SE: 0.41) | 26.75<br>(SE: 0.39) | 26.22<br>(SE: 0.37) | 26.55<br>(SE: 0.39) | 26.21<br>(SE: 0.41) | 25.95<br>(SE: 0.42) | 26.08<br>(SE: 0.42) | 26.18<br>(SE: 0.40) | 26.39<br>(SE: 0.39) | 26.43<br>(SE: 0.39) | 26.19<br>(SE: 0.41) | 26.36<br>(SE: 0.44) |
| Loneliness (DeJong Q)          |                | 2.32<br>(SE: 0.07)  | 2.39<br>(SE: 0.06)  | 2.36<br>(SE: 0.06)  | 2.37<br>(SE: 0.06)  | 2.27<br>(SE: 0.07)  | 2.17<br>(SE: 0.07)  | 2.15<br>(SE: 0.07)  | 2.34<br>(SE: 0.07)  | 2.42<br>(SE: 0.07)  | 2.46<br>(SE: 0.07)  | 2.53<br>(SE: 0.07)  | 2.45<br>(SE: 0.07)  |
| Fear of Covid-19               |                | 3.36<br>(SE: 0.03)  | 3.14<br>(SE: 0.02)  | 3.07<br>(SE: 0.02)  | 3.00<br>(SE: 0.02)  | 2.85<br>(SE: 0.02)  | 2.80<br>(SE: 0.03)  | 2.84<br>(SE: 0.03)  | 3.05<br>(SE: 0.02)  | 2.93<br>(SE: 0.02)  | 3.05<br>(SE: 0.03)  | 3.07<br>(SE: 0.03)  | 2.90<br>(SE: 0.03)  |
| Perceived mental health impact |                | 2.60<br>(SE: 0.03)  | 2.52<br>(SE: 0.03)  | 2.51<br>(SE: 0.02)  | 2.49<br>(SE: 0.03)  | 2.37<br>(SE: 0.03)  | 2.35<br>(SE: 0.03)  | 2.32<br>(SE: 0.03)  | 2.41<br>(SE: 0.03)  | 2.42<br>(SE: 0.03)  | 2.51<br>(SE: 0.03)  | 2.52<br>(SE: 0.03)  | 2.43<br>(SE: 0.03)  |
| Positive coping                |                | 3.72<br>(SE: 0.02)  | 3.66<br>(SE: 0.02)  | 3.65<br>(SE: 0.02)  | 3.62<br>(SE: 0.02)  | 3.59<br>(SE: 0.02)  | 3.61<br>(SE: 0.02)  | 3.57<br>(SE: 0.02)  | 3.56<br>(SE: 0.02)  | 3.56<br>(SE: 0.02)  | 3.55<br>(SE: 0.02)  | 3.51<br>(SE: 0.02)  | 3.56<br>(SE: 0.02)  |
| Happiness                      |                | 5.07<br>(SE: 0.04)  | 5.03<br>(SE: 0.04)  | 5.10<br>(SE: 0.04)  | 5.04<br>(SE: 0.04)  | 5.07<br>(SE: 0.04)  | 5.06<br>(SE: 0.04)  | 5.06<br>(SE: 0.04)  | 5.05<br>(SE: 0.04)  | 5.00<br>(SE: 0.04)  | 5.00<br>(SE: 0.04)  | 4.98<br>(SE: 0.04)  | 5.00<br>(SE: 0.04)  |
